# Supplementary material for: Effects of Al addition to Si-based flux on the growth of 4H-SiC films by vapour–liquid–solid pulsed laser deposition
Source: Royal Society of Chemistry journal article supplement (doi:10.1039/c7ce00945c), 2017-01-01
Supplement: c7ce00945c1.pdf [file c7ce00945c1.pdf]

## Effects of Al addition to Si-based flux on the growth of 4H-SiC films by vapour-liquid-solid pulsed laser deposition

R. Yamaguchi,<sup>a</sup> A. Osumi,<sup>a</sup> A. Onuma,<sup>a</sup> K. Nakano,<sup>a</sup> S. Maruyama,<sup>a</sup> T. Mitani,<sup>b</sup> T. Kato,<sup>b</sup> H. Okumura,<sup>b</sup> and Y. Matsumoto <sup>\*a</sup>

<sup>a</sup> Department of Applied Chemistry, Tohoku University, Sendai, 980-8579, Japan.

<sup>b</sup> National Institute of Advanced Industrial Science and Technology, Ibaraki 305-8569, Japan

\*Corresponding authors

### Supporting information

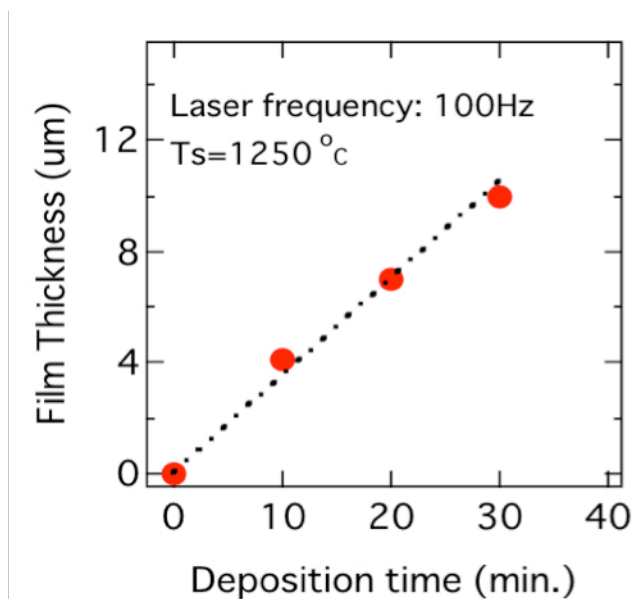

**Figure S1.** The thickness of SiC films plotted as a function of deposition time. A good linear relationship between them gives a VLS growth rate of  $\sim 25\mu\text{m/h}$  in average under the present deposition conditions.

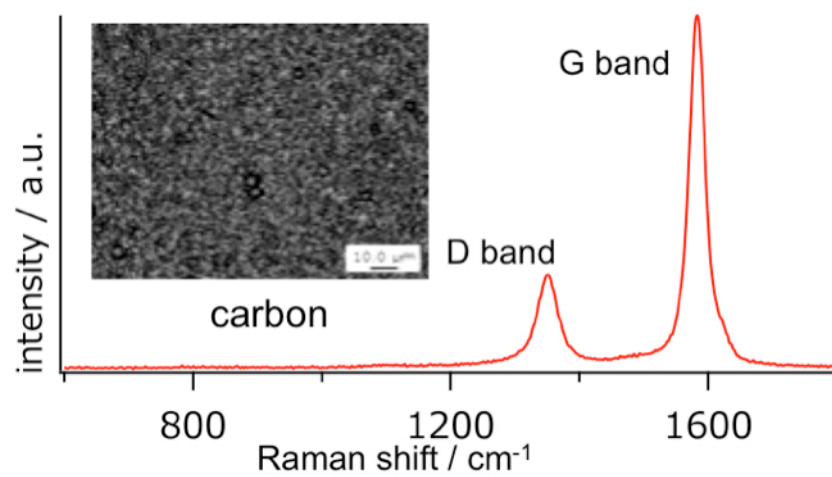

**Figure S2.** A typical Raman spectrum for a film obtained by depositing SIC without flux at 1250 °C, along with its SEM image (inset).
